# Leucoaraiosis, nigrostriatal denervation and motor symptoms in Parkinson's disease

Nicolaas I. Bohnen,<sup>1,2,3</sup> Martijn L. T. M. Müller,<sup>1</sup> Natalia Zarzhevsky,<sup>1</sup> Robert A. Koeppe,<sup>1</sup> Christopher W. Bogan,<sup>1</sup> Michael R. Kilbourn,<sup>1</sup> Kirk A. Frey<sup>1,2</sup> and Roger L. Albin<sup>2,3</sup>

1 Department of Radiology, Division of Nuclear Medicine, University of Michigan, Ann Arbor, MI 48105-9755, USA

2 Department of Neurology, University of Michigan, Ann Arbor, MI 48105-9755, USA

3 Neurology Service and Geriatric Research Education and Clinical Center, Veterans Administration Ann Arbor Healthcare System, Ann Arbor, MI 48105, USA

Correspondence to: Nicolaas I. Bohnen, MD, PhD,  
Functional Neuroimaging,  
Cognitive and Mobility Laboratory,  
Departments of Radiology and Neurology,  
University of Michigan,  
24 Frank Lloyd Wright Drive,  
Box 362, Ann Arbor,  
MI 48105-9755, USA  
E-mail: nbohn@umich.edu

Leucoaraiosis is associated with motor symptoms in otherwise normal older adults. Comorbid leucoaraiosis is predicted to contribute also to motor features in Parkinson's disease but previous studies of white matter changes in Parkinson's disease show variable results. No prior studies have compared directly the effects of both leucoaraiosis and the degree of nigrostriatal dopaminergic denervation on motor features. We investigated the effect of leucoaraiosis severity on motor impairment independent of the degree of nigrostriatal dopaminergic denervation in Parkinson's disease. Seventy-three subjects with Parkinson's disease (Hoehn and Yahr stages 1–3) underwent brain magnetic resonance and [<sup>11</sup>C]dihydrotetrabenazine vesicular monoamine transporter type 2 positron emission tomography imaging. Automated assessment of supratentorial fluid-attenuated inversion recovery magnetic resonance hyperintense white matter voxels was performed using cerebellar white matter as the intensity reference. White matter signal hyperintensity burden was log-transformed and normalized for brain volume. Unified Parkinson's Disease Rating Scale total and subscore ratings were assessed to determine motor impairment. Subjects receiving dopaminergic medications were examined in the clinically defined 'OFF' state. Multivariate regression analysis with measures of white matter signal hyperintensity burden and nigrostriatal denervation as independent variables demonstrated a significant overall model for total motor Unified Parkinson's Disease Rating Scale scores ( $F = 11.4$ ,  $P < 0.0001$ ) with significant regression effects for both white matter signal hyperintensity burden ( $t = 2.0$ ,  $\beta = 0.22$ ,  $P = 0.045$ ) and striatal monoaminergic binding ( $t = -3.5$ ,  $\beta = -0.38$ ,  $P = 0.0008$ ). Axial motor impairment demonstrated a robust association with white matter signal hyperintensity burden ( $t = 4.0$ ,  $\beta = 0.43$ ,  $P = 0.0001$ ) compared with striatal monoaminergic binding ( $t = -2.1$ ,  $\beta = 0.22$ ,  $P = 0.043$ ). White matter signal hyperintensity burden regression effects for bradykinesia had borderline significance. No significant white matter signal hyperintensity burden effects were found for rigidity or tremor subscores. White matter signal hyperintensity burden was significantly higher in the subgroup with postural instability and gait difficulties compared with the tremor-predominant subgroup despite no significant differences in age or duration of disease. These findings indicate that increased white matter signal hyperintensity burden is associated with worse motor performance independent of the degree of nigrostriatal dopaminergic denervation in Parkinson's disease. Comorbid white matter disease is a greater determinant of axial motor impairment than nigrostriatal dopaminergic denervation.

Received February 26, 2011. Revised April 18, 2011. Accepted April 20, 2011. Advance Access publication June 8, 2011

© The Author (2011). Published by Oxford University Press on behalf of the Guarantors of Brain. All rights reserved.

For Permissions, please email: journals.permissions@oup.com

**Keywords:** dopamine; motor; Parkinson's disease; leucoaraiosis; magnetic resonance imaging; white matter hyperintensities

**Abbreviations:** UPDRS = Unified Parkinson's Disease Rating Scale

## Introduction

Areas with altered signal intensity in white matter are encountered frequently on brain imaging studies in the elderly (Gunning-Dixon and Raz, 2000). These white matter abnormalities, or leucoaraiosis, are associated commonly with small vessel cerebrovascular disease, often in the context of diabetes and cardiovascular disease (Pantoni and Garcia, 1997). White matter changes are associated with loss of vascular and reduced blood–brain barrier integrity (Young *et al.*, 2008). In otherwise normal older adults, white matter abnormalities have been associated with subtle abnormalities of balance and gait (Longstreth and Manolio, 1996; Baezner *et al.*, 2008; Soumare *et al.*, 2009; Murray *et al.*, 2010; de Laat *et al.*, 2011).

As white matter changes are associated with motor dysfunction in otherwise normal elderly adults, comorbid leucoaraiosis could be predicted to also contribute to clinical features in Parkinson's disease. It is plausible that leucoaraiosis severity is an independent contributor to motor impairments in Parkinson's disease. Previous studies, however, of motor impairment and white matter changes in Parkinson's disease show variable results with some studies indicating more severe axial motor symptoms associated with comorbid leucoaraiosis (Piccini *et al.*, 1995; Lee *et al.*, 2009). Correlations between leucoaraiosis severity and symptoms of rigidity and bradykinesia are inconsistent (Sohn and Kim, 1998; Acharya *et al.*, 2007; Slawek *et al.*, 2010). Accurate assessment of the contribution of leucoaraiosis severity to motor dysfunction in Parkinson's disease is inherently difficult in the absence of an objective marker of Parkinson's disease-specific pathology that can be used to directly assess the relative contributions of nigrostriatal denervation and white matter changes. The primary goal of the present study was to investigate the relationship between leucoaraiosis severity and motor impairments relative to the degree of nigrostriatal dopaminergic denervation in Parkinson's disease as determined by [ $^{11}\text{C}$ ]dihydrotrabenazine PET. The secondary goal was to determine if leucoaraiosis severity correlates with specific aspects of motor dysfunction in Parkinson's disease. Demonstration that leucoaraiosis severity correlates with some, but not all, motor dysfunctions in Parkinson's disease would strongly support the conclusion that leucoaraiosis severity is an independent determinant of motor impairment in Parkinson's disease.

## Materials and methods

### Subjects and clinical test battery

This cross-sectional study involved 73 subjects with Parkinson's disease (62 males; 11 females). Subjects met the UK Parkinson's Disease Society Brain Bank Research Centre clinical diagnostic criteria for Parkinson's disease (Hughes *et al.*, 1992). Subjects were recruited

from an academic medical centre, Parkinson's disease support groups and a Department of Veterans Affairs hospital. Recruitment from the latter source, which has a predominantly male patient population, explains the male predominance in our study sample beyond that typically seen in Parkinson's disease. Diagnoses of Parkinson's disease were confirmed by the presence of nigrostriatal dopaminergic denervation on dihydrotrabenazine PET imaging. Patients had mild-to-moderate severity of disease; two subjects were Hoehn and Yahr stage 1, two subjects were Hoehn and Yahr stage 1.5, 18 subjects were Hoehn and Yahr stage 2, 29 subjects were Hoehn and Yahr stage 2.5 and 22 subjects were Hoehn and Yahr stage 3 (Hoehn and Yahr, 1967). The mean age of subjects was  $68.5 \pm 8.9$  years (range 51–83) with mean duration of disease  $6.9 \pm 3.8$  years (range 0.5–17). The mean Mini-Mental State Examination score was  $28.9 \pm 1.7$  (range 21–30) (Folstein *et al.*, 1975). The mean Clinical Dementia Rating Scale score was  $0.4 \pm 0.5$  (range 0–2) (Hughes *et al.*, 1982). The mean Unified Parkinson's Disease Rating Scale (UPDRS) score was  $26.7 \pm 8.0$  (range 5–46) (Fahn and Elton, 1987). UPDRS motor scores were divided into subscores for tremor (UPDRS items 20 and 21), rigidity (item 22), bradykinesia (items 23–26 and 31) and axial symptoms (items 27–30). Patients were subclassified into three subtypes by Jankovic's method (Jankovic *et al.*, 1990). Depending on the dominant motor features, the Parkinson's disease subtype was defined as (i) tremor dominant; (ii) postural instability and gait difficulty dominant; or (iii) intermediate. Subtype classification is based on the ratio of the average of UPDRS 'tremor' items (16, 20 and 21) divided by the average of 'postural instability and gait difficulty dominant' items (13–15, 29 and 30). This ratio indicates the Parkinson's disease subtypes as follows:  $\leq 1.0$  = postural instability and gait difficulty dominant,  $\geq 1.5$  = tremor dominant and  $> 1.0$  and  $< 1.5$  = intermediate.

Subjects treated with dopaminergic drugs were examined and imaged in the morning after withholding dopaminergic drugs overnight ('OFF' state). Forty patients were taking a combination of dopamine agonists and carbidopa–levodopa, 21 were taking carbidopa–levodopa alone, 10 were taking dopamine agonists alone, and two were not on dopaminergic medications. Dopamine agonist use in the subjects consisted of either short-acting ropinirole or pramipexole formulations. Levodopa equivalent dose was calculated using published conversion formulae (Tomlinson *et al.*, 2010). The mean levodopa equivalent dose was  $733 \pm 487$  (range 150–2725) mg. Subjects with a large vessel stroke, striatal lacunar states, intracranial mass lesion, contraindication for MRI (such as deep brain stimulator), moderate to severe dementia, normal dihydrotrabenazine PET scan, inability to lie still on a magnetic resonance or PET camera table or disabling freezing were not eligible for the study. Subjects were consecutively recruited as long as they met eligibility criteria and were willing to undergo the study procedures. Table 1 provides baseline clinical characteristics of the subjects. The study was approved by the Institutional Review Boards of the University of Michigan and Ann Arbor Veterans Administration Medical Centre for studies involving human subjects.

### Imaging techniques

MRI was performed on a 3 Tesla Philips Achieva system (Philips) utilizing an 8-channel head coil and the 'ISOVOX' exam card protocol primarily designed to yield isotropic  $T_1$  spoiled gradient (SPGR) spatial resolution. A standard  $T_1$ -weighted series of a 3D inversion

**Table 1** Summary of clinical characteristics of the study subjects (*n* = 73)

|                                                                | Average (SD/range or percentage) |
|----------------------------------------------------------------|----------------------------------|
| Age (years)                                                    | 68.5 ± 8.9 (51–83)               |
| Male/female                                                    | 62/11                            |
| Age of onset of motor disease                                  | 61.6 ± 9.8 (34.5–82.0)           |
| Disease duration (years)                                       | 6.9 ± 3.8 (0.5–17)               |
| Hoehn and Yahr Stage                                           | 2.5 ± 0.5 (1–3)                  |
| UPDRS part I (mentation, behaviour and mood) score             | 2.2 ± 1.5 (0–5)                  |
| UPDRS part II (activities of daily living) score               | 10.9 ± 4.9 (0–21)                |
| UPDRS part III (motor) score                                   | 26.7 ± 8.0 (5–46)                |
| Tremor-predominant motor phenotype                             | 25/73                            |
| Postural instability and gait difficulty motor phenotype       | 36/73                            |
| Intermediate motor phenotype <sup>a</sup>                      | 10/73                            |
| History of freezing of gait                                    | 20/73 (27.4)                     |
| History of falls                                               | 30/73 (41.1)                     |
| History of dyskinesias                                         | 14/73 (19.2)                     |
| Presence of mild hallucinations or delusions                   | 7/73 (9.6)                       |
| Levodopa equivalent dose                                       | 733 ± 487 (150–2725)             |
| Mini-Mental State Examination score                            | 28.9 ± 1.7 (21–30)               |
| Clinical dementia rating scale                                 | 0.4 ± 0.5 (0–2)                  |
| Subjects on anti-depressants                                   | 15/73 (20.5)                     |
| Subjects on benzodiazepines                                    | 8/73 (10.9)                      |
| Smoking                                                        | 4/73 (5.5)                       |
| Hypertension                                                   | 27/73 (37)                       |
| Diabetes mellitus                                              | 7/73 (9.6)                       |
| Hyperlipidaemia                                                | 18/73 (24.7)                     |
| History of atrial fibrillation                                 | 2/73 (2.7)                       |
| History of myocardial infarction or transient ischaemic attack | 6/73 (8.2)                       |
| Subjects on warfarin anti-coagulation                          | 3/73 (4.1)                       |
| Subjects on anti-platelet drugs                                | 23/73 (31.5)                     |

a Two subjects could not be classified because of a summed postural instability and gait difficulty dominant score of zero.

recovery-prepared turbo-field-echo was performed in the sagittal plane with repetition time/echo time/inversion time = 9.8/4.6/1041 ms; turbo factor = 200; single average; field of view = 240 × 200 × 160 mm; acquired matrix = 240 × 200. Slices (*n* = 160) were reconstructed to 1 mm isotropic resolution. This sequence maximizes contrast among grey matter, white matter and CSF and provides high-resolution delineation of cortical and subcortical structures. Subjects also completed a volumetric and fast fluid-attenuated inversion recovery (FLAIR) (repetition time/echo time = 9002/56 ms effective; inversion time = 2200 ms, number of excitations = 1; slice thickness = 1.5 mm) brain magnetic resonance sequence.

Vesicular monoamine transporter type 2 (VMAT2) PET imaging was performed in 3D imaging mode using an ECAT HR+ tomograph (Siemens Molecular Imaging, Inc.), which acquires 63 transaxial slices (slice thickness: 2.4 mm; intrinsic in-plane resolution: 4.1 mm full-width at half maximum over a 15.2 cm axial field-of-view). A NeuroShield (Scanwell Systems) head-holder/shielding unit was attached to the patient bed to reduce the contribution of photons originating from the body outside the scanner field-of-view (Thompson *et al.*, 2001).

Prior to the dihydrotetrabenazine injection, a 5-min transmission scan was acquired using rotating <sup>68</sup>Ge rods for attenuation correction of emission data using the standard vendor-supplied segmentation and reprojection routines.

No-carrier-added (+)-[<sup>11</sup>C]dihydrotetrabenazine (250–1000 Ci/mmol at the time of injection) was prepared as reported previously (Jewett *et al.*, 1997). Dynamic PET scanning was performed for 60 min beginning immediately following a bolus injection of 55% of a 666 MBq (18 mCi) total (+)-[<sup>11</sup>C] dihydrotetrabenazine dose (containing <50 µg of cold dihydrotetrabenazine mass) over the first 15–30 s of the study, while the remaining 45% of the dose was continuously infused over the next 60 min, resulting in stable arterial tracer levels and equilibrium with brain tracer levels after 30 min (Koeppel *et al.*, 1997). A 15-frame sequence of scans over 60 min were obtained as follows: four at 30 s; three at 1 min; two at 2 min 30 s; two at 5 min; and four at 10 min. All subjects were studied supine, with eyes and ears unoccluded, resting quietly in a dimly lit room.

## Positron emission tomography analysis

All image frames were spatially coregistered within subject with a rigid-body transformation to reduce the effects of subject motion during the imaging session (Minoshima *et al.*, 1993). IDL image analysis software (Research Systems, Inc.) was used to manually trace volumes of interest on the magnetic resonance scans representing the striatum, including the putamen and caudate nucleus. Total cortical volumes of interest were defined using semi-automated threshold delineation of cortical grey matter signal on the MRI scan.

Dihydrotetrabenazine images were analysed using equilibrium modelling to estimate the non-displaceable binding potential ( $BP_{ND}$ ), which is equivalent to the ratio of specific ( $V_S$ ) to non-displaceable ( $V_{ND}$ ) binding in each imaged voxel or target volume of interest (Koeppel *et al.*, 1997). We estimated specific [<sup>11</sup>C]dihydrotetrabenazine binding by subtraction of the global neocortex value, a reference region very low in VMAT2 binding sites, with the assumption that the non-displaceable distribution is uniform across the brain at equilibrium (Koeppel *et al.*, 1999).

## Reference-based automated assessment of supratentorial hyperintense white matter voxels

Automated methods of magnetic resonance FLAIR-based white matter signal hyperintensity burden assessment have been developed based on the use of a reference region or tissue, such as intensity of normal grey matter (de Boer *et al.*, 2009). We previously developed a routine to define hyperintense supratentorial voxels in which we use the mean intensity of cerebellar white matter voxels on magnetic resonance FLAIR images as a reference (Bohnen *et al.*, 2009). The cerebellum was chosen as a reference region because of the clinical observation that age-associated white matter changes, unlike diseases such as multiple sclerosis, relatively spare the cerebellum (Bohnen *et al.*, 2009). In brief, spatial preprocessing and white matter segmentation was performed with standard routines and functions in the software package SPM5 (Ashburner and Friston, 1997, 2005). The total number of supratentorial white matter voxels on FLAIR images that were hyperintense relative to a cerebellar white matter intensity cut-off of mean + 1.65 SD was computed and then log transformed. Data were also normalized for supratentorial white matter volume (Bohnen *et al.*, 2009).

## Statistical analysis

Multivariate regression analysis was used to evaluate regression effects of imaging variables on motor outcome variables. Total striatal VMAT-2 binding was selected as the primary PET variable to avoid denervation 'floor' effects that are present with putaminal dopaminergic levels in Parkinson's disease (Bohnen *et al.*, 2007). Analysis of covariance was used to evaluate differences among patient subgroups. Pearson's correlation coefficients were computed, except for variables that were not normally distributed which were analysed using Spearman rank correlation coefficients (*R*s). Data were analysed using the SAS program (version 9.2, SAS Institute).

## Results

All patients had a typical nigrostriatal pattern of denervation on the VMAT2 PET scans, with posterior putaminal greater than caudate denervation. The mean striatal VMAT2 volume of distribution was  $1.92 \pm 0.30$  (range 1.39–2.86). The log normalized and volume corrected supratentorial hyperintensity white matter variable had a mean value of  $10.07 \times 10^{-6} \pm 2.44 \times 10^{-6}$  (range  $4.37 \times 10^{-6}$ – $17.35 \times 10^{-6}$ ). The white matter hyperintensity measure had a normal distribution (Kolmogorov–Smirnov  $D = 0.06$ ,  $P > 0.15$ ).

### Motor analysis: total group

Increased white matter hyperintensities were associated with higher Hoehn and Yahr stages ( $R_s = 0.42$ ,  $P = 0.0002$ ) and higher total UPDRS motor scores ( $R = 0.34$ ,  $P = 0.0035$ ). Corresponding bivariate correlation coefficients for the UPDRS subscores were as follows: axial ( $R = 0.49$ ;  $P < 0.0001$ ); bradykinesia ( $R = 0.30$ ;  $P = 0.0088$ ); rigidity ( $R = 0.08$ ;  $P = 0.50$ ) and tremor ( $R = -0.16$ ;  $P = 0.17$ ). Results of multivariate regression analyses using striatal VMAT2 binding and white matter hyperintensities as independent variables and UPDRS total motor and subscores as dependent variables are shown in Table 2. There was a significant overall model for total UPDRS motor scores ( $F = 11.4$ ,  $P < 0.0001$ ) with significant regression effects for both white matter hyperintensities ( $t = 2.0$ ,  $\beta = 0.22$ ,  $P = 0.045$ ) and striatal VMAT2 binding ( $t = -3.5$ ,  $\beta = -0.38$ ,  $P = 0.0008$ ). Axial motor impairments demonstrated more robust regression for white matter hyperintensities ( $t = 4.0$ ,  $\beta = 0.43$ ,  $P = 0.0001$ ) compared with striatal VMAT2 binding ( $t = -2.1$ ,  $\beta = 0.22$ ,  $P = 0.043$ ). White matter hyperintensities regression effects for bradykinesia had borderline

significance. No significant white matter hyperintensity effects were found for rigidity or tremor scores (Table 2). Figure 1 shows a scatter plot of white matter hyperintensities and axial UPDRS motor scores.

### Motor subgroup analysis: subjects with and without motor fluctuations

To take into account possible differences of practically defined motor 'OFF' ratings between subjects with and without motor fluctuations, i.e. freezing, we performed separate subgroup analyses. First, analysis limited to the subjects without freezing ( $n = 53$ ) demonstrated similar findings for axial motor scores, which demonstrated a significant overall model ( $F = 7.4$ ,  $P = 0.0015$ ) with significant regression effects for white matter hyperintensities ( $t = 2.9$ ,  $\beta = 0.37$ ,  $P = 0.005$ ), and non-significant trend for striatal VMAT2 binding ( $t = -1.8$ ,  $\beta = -0.22$ ,  $P = 0.086$ ). Second, analysis limited to the smaller subgroup of subjects with freezing ( $n = 20$ ) also demonstrated a significant overall model ( $F = 3.9$ ,  $P = 0.041$ ) with significant regression effects for white matter hyperintensities ( $t = 2.1$ ,  $\beta = 0.47$ ,  $P = 0.0048$ ), and non-significant effect for striatal VMAT2 binding ( $t = -0.8$ ,  $\beta = -0.16$ ,  $P = 0.45$ ).

We performed an additional analysis for axial motor scores by entering the total levodopa equivalent dose in the regression model for the complete group. Results demonstrated a significant overall model ( $F = 11.8$ ,  $P < 0.0001$ ) with significant regression effects most robust for white matter hyperintensities ( $t = 4.4$ ,  $\beta = 0.46$ ,  $P < 0.0001$ ), moderate significant effect for levodopa equivalent dose ( $t = 2.4$ ,  $\beta = 0.26$ ,  $P = 0.021$ ) and no longer significant for striatal VMAT2 binding ( $t = -0.9$ ,  $\beta = -0.10$ ,  $P = 0.26$ ). As expected, there was a significant inverse correlation between striatal VMAT2 binding and levodopa equivalent dose ( $R = -0.42$ ,  $P = 0.0002$ ), whereas there was no significant correlation between levodopa equivalent dose and white matter hyperintensities ( $R = 0.008$ ,  $P = 0.94$ ).

### Motor phenotype subgroup analysis: postural instability and gait difficulty dominant versus tremor-predominant versus intermediate phenotypes

Thirty-six subjects were postural instability and were gait difficulty dominant, 25 subjects were tremor dominant and 10 subjects had

**Table 2** Results of multivariate regression analysis of the UPDRS scores

| Dependent variable | Striatal VMAT2 binding |                | White matter hyperintensities |               | Overall model |          |
|--------------------|------------------------|----------------|-------------------------------|---------------|---------------|----------|
|                    | $\beta$                | $t$ ( $P$ )    | $\beta$                       | $t$ ( $P$ )   | $F$           | $P$      |
| UPDRS total motor  | -0.38                  | -3.5 (0.0008)* | 0.22                          | 2.0 (0.045)   | 11.4          | <0.0001* |
| UPDRS axial motor  | -0.22                  | -2.1 (0.043)   | 0.43                          | 4.0 (0.0001)* | 14.0          | <0.0001* |
| UPDRS bradykinesia | -0.35                  | -3.1 (0.0027)  | 0.20                          | 1.8 (0.08)    | 8.9           | 0.0004*  |
| UPDRS tremor       | 0.0027                 | 0.02 (0.98)    | -0.16                         | -1.3 (0.20)   | 0.9           | 0.41     |
| UPDRS rigidity     | -0.24                  | -2.0 (0.053)   | 0.008                         | 0.07 (0.95)   | 2.2           | 0.12     |

Standardized coefficients ( $\beta$ ) are given for each independent variable with parameter  $t$ -value, level of significance and total model statistics.

\*Significant after Bonferroni correction.

an intermediate motor phenotype. Two subjects could not be classified because of a summed postural instability and gait difficulty dominant score of zero. There were no significant differences in average duration of disease ( $F = 1.6$ ,  $P = 0.20$ ;  $7.5 \pm 4.0$ ;  $5.9 \pm 3.5$  and  $7.6 \pm 3.2$  years for postural instability and gait difficulty dominant, tremor-predominant and intermediate motor phenotype subgroups, respectively) or age ( $F = 1.2$ ,  $P = 0.30$ ;  $70.3 \pm 9.0$ ;  $66.7 \pm 9.7$  and  $67.8 \pm 6.1$  years for postural instability and gait difficulty dominant, tremor-predominant and intermediate motor phenotype subgroups, respectively) among the three groups. Analysis of covariance using motor phenotype as the grouping variable, striatal VMAT2 binding as covariate and white matter hyperintensities as dependent variable demonstrated a significant overall model ( $F = 4.8$ ,  $P = 0.0043$ ), significant white matter hyperintensities group effect ( $F = 4.4$ ,  $P = 0.039$ ) and significant covariate VMAT2 effect ( $F = 3.7$ ,  $P = 0.029$ ). Duncan subgroup analysis demonstrated significantly higher white matter hyperintensities in the postural instability and gait difficulty dominant group ( $10.95 \times 10^{-6} \pm 2.38 \times 10^{-6}$ ) compared with the tremor-predominant group ( $9.16 \times 10^{-6} \pm 2.34 \times 10^{-6}$ ) but each not significantly different from the intermediate motor group ( $9.52 \times 10^{-6} \pm 2.08 \times 10^{-6}$ ).

## Individual item analysis

An individual item analysis of the postural instability and gait difficulty dominant components showed robust correlations between white matter hyperintensities and the retropulsion test ( $R_s = 0.40$ ,  $P = 0.0005$ ), walking assessment by history ( $R_s = 0.25$ ,  $P = 0.033$ ) and borderline correlations with gait examination ( $R_s = 0.22$ ,  $P = 0.06$ ). As a related clinical finding, there was a significant correlation between white matter hyperintensities and UPDRS rating

of posture ( $R_s = 0.43$ ,  $P = 0.0002$ ). There was a weak correlation between white matter hyperintensities and speech difficulties ( $R_s = 0.23$ ,  $P = 0.047$ ).

Finally, we evaluated effects of specific motor complications in relationship to white matter hyperintensities. Three separate analyses of covariance using white matter hyperintensities as the outcome parameter, presence or absence of freezing, falls or dyskinesias as grouping variable, respectively, and using striatal VMAT2 binding as covariate did not reveal main group effects for subjects with freezing ( $F = 2.53$ ,  $P = 0.12$ ), falls ( $F = 1.33$ ,  $P = 0.25$ ) or dyskinesias ( $F = 0.44$ ,  $P = 0.51$ ).

## Discussion

Previous studies of motor impairment and leucoaraiosis severity in Parkinson's disease show variable results, with several studies indicating more severe axial motor features associated with greater comorbid white matter disease (Piccini *et al.*, 1995; Lee *et al.*, 2009). Prior reports suggest inconsistent correlations between white matter changes and symptoms of rigidity or bradykinesia (Sohn and Kim, 1998; Acharya *et al.*, 2007; Slawek *et al.*, 2010). The variable results obtained in prior studies of comorbid leucoaraiosis correlates in Parkinson's disease may relate to differences in assessment methods of white matter changes, differing patient populations and—most importantly—lack of an objective covariate marker of Parkinson's disease-specific nigrostriatal pathology. Our results indicate that comorbid leucoaraiosis is associated with worsening motor performance independent of the degree of nigrostriatal dopaminergic denervation in Parkinson's disease. In particular, comorbid leucoaraiosis is a greater predictor of axial motor impairment than nigrostriatal dopaminergic

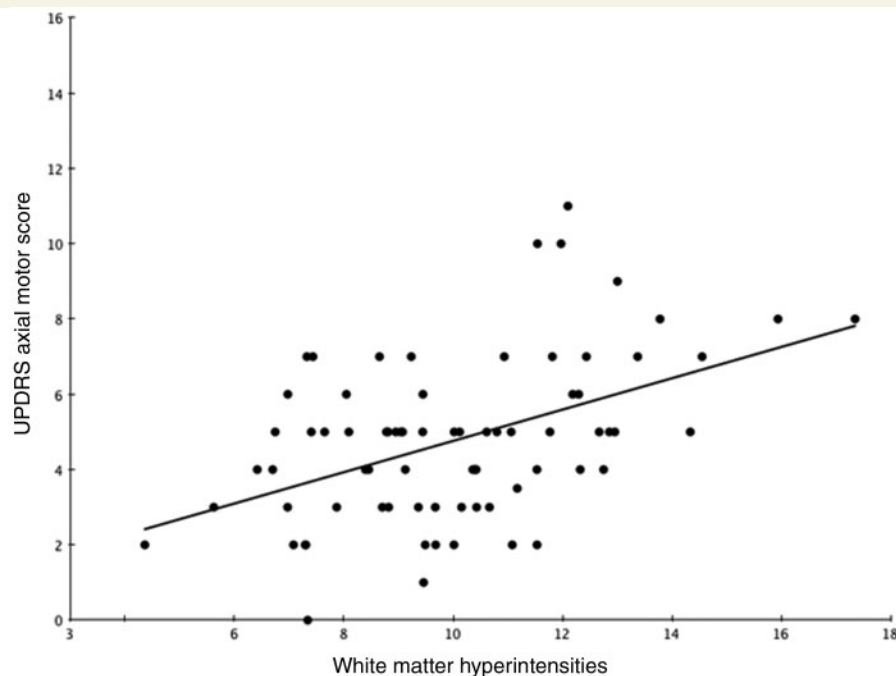

**Figure 1** Scatter plot of leucoaraiosis severity ( $\times 10^{-6}$ ) and axial UPDRS motor scores.

denervation. Independent effects of white matter hyperintensities on bradykinesia and gait had borderline significance and there were no significant independent effects of white matter changes for tremor or rigidity scores.

In comparisons of motor subtypes, severity of leucoaraiosis was significantly higher in the postural instability and gait difficulty dominant subgroup compared with the tremor-predominant subgroup. Individual motor test items with robust correlation with leucoaraiosis severity included postural instability, as defined by the retropulsion test and walking assessment by history. There was no significant leucoaraiosis correlation with the history of falls. As a related clinical finding, there was a significant correlation between white matter hyperintensities and ratings of posture. There was a borderline correlation of freezing with white matter changes. The different strength of associations between leucoaraiosis severity and different motor dysfunctions of Parkinson's disease and greater leucoaraiosis severity in the postural instability and gait difficulty dominant subtype supports the conclusion that leucoaraiosis severity is an independent determinant of motor dysfunction in Parkinson's disease.

In a large group of 141 patients with Parkinson's disease, Lee *et al.* (2009) found that leucoaraiosis was associated with the postural instability and gait difficulty dominant subgroup. These authors found significant correlations between white matter hyperintensities and ratings of bradykinesia and rigidity but that study did not control for the effects of nigrostriatal dopaminergic denervation.

Balance problems are common and disabling in Parkinson's disease and are poorly responsive to dopamine replacement therapy (Bloem *et al.*, 2003; Bohnen and Cham, 2006). Our findings support the concept that non-dopaminergic mechanisms contribute significantly to impaired balance in Parkinson's disease. Postural control is not simply a summation of static reflexes but involves complex coordination and integration of visual, somatosensory and vestibular systems. Relative weight placed on each of these sensory system inputs is dependent on the goals of the movement task and the environmental context (Horak, 2006). Comorbid white matter changes are predicted to significantly interfere with postural control systems because of the widespread and bilateral hemispheric distribution of these neural systems. It is likely that white matter changes interfere with the central and cognitive processing of sensorimotor signals, leading to impaired postural responses (Kuo and Lipsitz, 2004). White matter changes may interrupt corticocortical and long descending fibre tracts and may thus reduce the efficiency of CNS integration of postural control (Murray *et al.*, 2010).

Our findings indicate a significant relationship between burden of white matter disease and Hoehn and Yahr disease stage (Hoehn and Yahr, 1967). As disease severity ratings increase, the number of general and instrumental activities of daily living reported as being performed either with any difficulty or needing assistance, also progressively increase (Shulman *et al.*, 2008). Disability with loss of independent function is usually first reported between Hoehn and Yahr stages 2 to 3 (Shulman *et al.*, 2008). Thus, the transition from Hoehn and Yahr stage 2 to 3 marks a pivotal milestone in Parkinson's disease, characterized by the emergence of postural instability, when gait and balance impairment results in

disability in many gait-dependent activities. Our results also indicate that the effects of leucoaraiosis on axial motor impairment are more robust compared with nigrostriatal dopaminergic denervation alone. Therefore, assessment of white matter disease may potentially be used as a clinically relevant biomarker in studies of disease progression in Parkinson's disease.

We found also that ratings of abnormal posture are associated strongly with increased severity of leucoaraiosis in Parkinson's disease. Stooped posture and its related displacement of the centre-of-pressure contribute to impairments of postural control (Bloem *et al.*, 1999). Some postural abnormalities seen in patients with Parkinson's disease can be reproduced in healthy subjects by mimicking a stooped parkinsonian posture (Jacobs *et al.*, 2005). None of our patients met clinical criteria for camptocormia or Pisa syndrome, which is considered a form of axial dystonia (Djaldetti *et al.*, 1999). Although stooped posture is a destabilizing posture, comorbid leucoaraiosis was not significantly associated with an increased risk of falls in our study.

An important question is whether comorbid leucoaraiosis in Parkinson's disease reflects effects of normal ageing, a disease-specific effect, or is due to other pathological processes (Levy, 2007). We found greater severity of comorbid leucoaraiosis in the postural instability and gait difficulty dominant subgroup compared with the tremor-predominant subgroup despite no significant differences in age or duration of disease, suggesting that increased leucoaraiosis in the postural instability and gait difficulty dominant group is not fully a function of normal ageing. Further research is needed to evaluate possible interaction effects between Parkinson disease and leucoaraiosis processes (Bohnen and Albin, 2011).

The specific aetiology of leucoaraiosis-white matter hyperintensities is a matter of ongoing investigation. These changes are associated with vascular disease risk factors and vascular pathology, particularly that of microvasculature, is generally regarded as a significant factor in leucoaraiosis-white matter hyperintensities (van Swieten *et al.*, 1991; Pantoni and Garcia, 1997; Brown *et al.*, 2009; Brown and Thore, 2011). Other processes may contribute to leucoaraiosis-white matter hyperintensities. Wallerian degeneration secondary to loss of cortical or grey matter neuronal perikarya is a possible cause of subcortical and deep white matter leucoaraiosis-white matter hyperintensities (Leys *et al.*, 1991). On the other hand, Wallerian degeneration could be secondary also to loss of cortical or other grey matter neuronal perikarya due to microinfarcts (Smith, 2010). The latter would be a second mechanism by which an independent pathological process, vascular disease, causes cerebral injury in Parkinson's disease (Longstreth *et al.*, 2009). Wersching *et al.* (2010) suggested that low-grade inflammation contributes to leucoaraiosis-white matter hyperintensities. Further research is needed to evaluate the roles of normal ageing, disease-specific neurodegenerative effects and independent pathological processes such as vascular disease or inflammation in comorbid white matter changes in Parkinson's disease.

Our findings support the concept that motor dysfunction in Parkinson's disease is multifactorial in origin. Prior dopaminergic imaging studies indicated that measures of bradykinesia have most robust correlation with nigrostriatal dopaminergic deficits in Parkinson's disease, whereas measures of tremor or rigidity have

no or poor correlations (Eidelberg *et al.*, 1990; Antonini *et al.*, 1995; Vingerhoets *et al.*, 1997; Pirker, 2003). These findings indicate that the spectrum of motor impairment in Parkinson's disease cannot be fully explained by presynaptic nigrostriatal dopaminergic denervation. Although leucoaraiosis severity is a robust determinant of axial motor impairment, white matter hyperintensities correlate only weakly with measures of bradykinesia and white matter hyperintensities do not significantly contribute to rigidity or tremor. We previously reported that degeneration of the pedunculo-pontine-thalamic cholinergic projection may contribute to increased fall risk in Parkinson's disease (Bohnen *et al.*, 2009), an inference supported by a recent pilot trial of cholinesterase inhibitors in Parkinson's disease (Chung *et al.*, 2010). The complex motor impairments of Parkinson's disease are likely caused by dopaminergic deficits, comorbid white matter disease, cholinergic system degeneration and other pathologies interacting in complex ways.

A limitation of this study is its cross-sectional nature; we cannot assess changes over time, and therefore, longitudinal studies are needed to confirm predictions from our findings. Prospective documentation of vascular risk factors, vascular risk factor treatment, markers of inflammation and use of anti-inflammatory drugs may be particularly valuable. Our subject population is not a true epidemiological sample but rather draws heavily from academic and Department of Veterans Affairs movement disorders clinics. To approximate a relatively unbiased sample, we excluded potential subjects with severe motor impairments or significant dementia. Nonetheless, it would be important to replicate our findings in a population-based sample. Another limitation is that our PET imaging technique does not allow assessment of the contribution of cortical dopaminergic or other monoaminergic system changes.

We conclude that increased severity of leucoaraiosis is associated independently with worsening axial motor impairments and stooped posture in Parkinson's disease. This conclusion is consistent with an emerging theme in neurodegeneration research; the importance of interactions between vascular, neuroinflammatory and neurodegenerative pathologies. Systematic post-mortem studies of dementias indicate that comorbid vascular pathology contributes significantly to the clinical manifestation of neurodegenerative dementias (Jagust *et al.*, 2008; Kuczyński *et al.*, 2008; Schneider and Bennett, 2010). This concept may have both immediate clinical and public health implications. Axial motor dysfunction is one of the most disabling features of advanced Parkinson's disease. It is possible that aggressive management of vascular or inflammatory risk factors in patients with Parkinson's disease could reduce the severity of axial motor dysfunction in Parkinson's disease. Similarly, aggressive treatment of vascular or inflammatory risk factors earlier in life might ameliorate the late life morbidity associated with Parkinson's disease and other neurodegenerations (Gao *et al.*, 2011).

## Acknowledgements

The authors thank Christine Minderovic, Jamie Miller, Virginia Rogers, the PET technologists, cyclotron operators and chemists, for their assistance.

## Funding

Department of Veterans Affairs; the Michael J. Fox Foundation; National Institutes of Health (grant number P01 NS015655 and R01 NS070856).

## References

- Acharya HJ, Bouchard TP, Emery DJ, Camicioli RM. Axial signs and magnetic resonance imaging correlates in Parkinson's disease. *Can J Neurol Sci* 2007; 34: 56–61.
- Antonini A, Vontobel P, Psylla M, Günther I, Maguire RP, Missimer J, et al. Complementary positron emission tomographic studies of the striatal dopaminergic system in Parkinson's disease. *Arch Neurol* 1995; 52: 1183–90.
- Ashburner J, Friston K. Multimodal image coregistration and partitioning—a unified framework. *Neuroimage* 1997; 6: 209–17.
- Ashburner J, Friston KJ. Unified segmentation. *Neuroimage* 2005; 26: 839–51.
- Baezner H, Blahak C, Poggesi A, Pantoni L, Inzitari D, Chabriet H, et al. Association of gait and balance disorders with age-related white matter changes: the LADIS study. *Neurology* 2008; 70: 935–42.
- Bloem BR, Beckley DJ, van Dijk JG. Are automatic postural responses in patients with Parkinson's disease abnormal due to their stooped posture? *Exp Brain Res* 1999; 124: 481–8.
- Bloem BR, Steijns JA, Smits-Engelsman BC. An update on falls. *Curr Opin Neurology* 2003; 16: 15–26.
- Bohnen NI, Albin RL. White matter lesions in Parkinson disease. *Nat Rev Neurol* 2011; 7: 229–36.
- Bohnen NI, Bogan CW, Müller MLTM. Frontal and periventricular brain white matter lesions and cortical deafferentation of cholinergic and other neuromodulatory axonal projections. *Eur Neurol J* 2009; 1: 33–40.
- Bohnen NI, Cham R. Postural control, gait, and dopamine functions in parkinsonian movement disorders. *Clin Geriatr Med* 2006; 22: 797–812.
- Bohnen NI, Kuwabara H, Constantine GM, Mathis CA, Moore RY. Grooved pegboard test as a biomarker of nigrostriatal denervation in Parkinson's disease. *Neurosci Lett* 2007; 424: 185–9.
- Bohnen NI, Muller ML, Koeppe RA, Studenski SA, Kilbourn MA, Frey KA, et al. History of falls in Parkinson disease is associated with reduced cholinergic activity. *Neurology* 2009; 73: 1670–6.
- Brown WR, Moody DM, Thore CR, Anstrom JA, Challa VR. Microvascular changes in the white matter in dementia. *J Neurol Sci* 2009; 283: 28–31.
- Brown WR, Thore CR. Review: cerebral microvascular pathology in ageing and neurodegeneration. *Neuropathol Appl Neurobiol* 2011; 37: 56–74.
- Chung KA, Lobb BM, Nutt JG, Horak FB. Effects of a central cholinesterase inhibitor on reducing falls in Parkinson disease. *Neurology* 2010; 75: 1263–9.
- de Boer R, Vrooman HA, van der Lijn F, Vernooij MW, Ikram MA, van der Lugt A, et al. White matter lesion extension to automatic brain tissue segmentation on MRI. *Neuroimage* 2009; 45: 1151–61.
- de Laat KF, Tuladhar AM, van Norden AG, Norris DG, Zwiers MP, de Leeuw FE. Loss of white matter integrity is associated with gait disorders in cerebral small vessel disease. *Brain* 2011; 134: 73–83.
- Djaldetti R, Mosberg-Galili R, Sroka H, Merims D, Melamed E. Camptocormia (bent spine) in patients with Parkinson's disease—characterization and possible pathogenesis of an unusual phenomenon. *Mov Disord* 1999; 14: 443–7.
- Eidelberg D, Moeller JR, Dhawan V, Sidtis JJ, Ginos JZ, Strother SC, et al. The metabolic anatomy of Parkinson's disease: complementary [<sup>18</sup>F]fluorodeoxyglucose and [<sup>18</sup>F]fluorodopa positron emission tomographic studies. *Mov Dis* 1990; 5: 203–13.

- Fahn S, Elton R. Members of the UPDRS development committee. Unified Parkinson's disease rating scale. In: Fahn S, Marsden C, Calne D, Goldstein M, editors. Recent developments in Parkinson's disease. Florham Park, NJ: Macmillan Healthcare Information; 1987. p. 153–64.
- Folstein MF, Folstein SE, McHugh PR. Mini-mental state: a practical method for grading the cognitive state of patients for the clinician. *J Psychiatry Res* 1975; 12: 189–98.
- Gao X, Chen H, Schwarzschild MA, Ascherio A. Use of ibuprofen and risk of Parkinson disease. *Neurology* 2011; 76: 863–9.
- Gunning-Dixon FM, Raz N. The cognitive correlates of white matter abnormalities in normal aging: A quantitative review. *Neuropsychology* 2000; 14: 224–32.
- Hoehn M, Yahr M. Parkinsonism: onset, progression, and mortality. *Neurology* 1967; 17: 427–42.
- Horak FB. Postural orientation and equilibrium: what do we need to know about neural control of balance to prevent falls? *Age Ageing* 2006; 35 (Suppl 2): ii7–11.
- Hughes CP, Berg L, Danziger WL, Coben LA, Martin RL. A new clinical scale for the staging of dementia. *Br J Psychiatr* 1982; 140: 566–72.
- Hughes AJ, Daniel SE, Kilford L, Lees AJ. Accuracy of clinical diagnosis of idiopathic Parkinson's disease: a clinicopathologic study of 100 cases. *J Neurol Neurosurg Psychiatry* 1992; 55: 181–4.
- Jacobs JV, Dimitrova DM, Nutt JG, Horak FB. Can stooped posture explain multidirectional postural instability in patients with Parkinson's disease? *Exp Brain Res* 2005; 166: 78–88.
- Jagust WJ, Zheng L, Harvey DJ, Mack WJ, Vinters HV, Weiner MW, et al. Neuropathological basis of magnetic resonance images in aging and dementia. *Ann Neurol* 2008; 63: 72–80.
- Jankovic J, McDermott M, Carter J, Gauthier S, Goetz C, Golbe L, et al. Variable expression of Parkinson's disease: a base-line analysis of the DATATOP cohort. The Parkinson Study Group. *Neurology* 1990; 40: 1529–34.
- Jewett DM, Kilbourn MR, Lee LC. A simple synthesis of [<sup>11</sup>C]dihydrotrabenazine (DTBZ). *Nucl Med Biol* 1997; 24: 197–9.
- Koeppel RA, Frey KA, Kuhl DE, Kilbourn MR. Assessment of extrastriatal vesicular monoamine transporter binding site density using stereoisomers of [<sup>11</sup>C]dihydrotrabenazine. *J Cereb Blood Flow Metab* 1999; 19: 1376–84.
- Koeppel RA, Frey KA, Kume A, Albin R, Kilbourn MR, Kuhl DE. Equilibrium versus compartmental analysis for assessment of the vesicular monoamine transporter using (+)-alpha-[<sup>11</sup>C]dihydrotrabenazine (DTBZ) and positron emission tomography. *J Cereb Blood Flow Metab* 1997; 17: 919–31.
- Kuczyński B, Reed B, Mungas D, Weiner M, Chui HC, Jagust W. Cognitive and anatomic contributions of metabolic decline in Alzheimer disease and cerebrovascular disease. *Arch Neurol* 2008; 65: 650–5.
- Kuo HK, Lipsitz LA. Cerebral white matter changes and geriatric syndromes: is there a link? *J Gerontol A Biol Sci Med Sci* 2004; 59: 818–26.
- Lee SJ, Kim JS, Lee KS, An JY, Kim W, Kim YI, et al. The severity of leucoaraiosis correlates with the clinical phenotype of Parkinson's disease. *Arch Gerontol Geriatr* 2009; 49: 255–9.
- Levy G. The relationship of Parkinson disease with aging. *Arch Neurol* 2007; 64: 1242–6.
- Leys D, Pruvo JP, Parent M, Vermersch P, Soetaert G, Steinling M, et al. Could Wallerian degeneration contribute to 'leuko-araiosis' in subjects free of any vascular disorder? *J Neurol Neurosurg Psychiatry* 1991; 54: 46–50.
- Longstreth WT, Manolio TA, Arnold A, Burke GL, Bryan N, Jungreis CA, et al. Clinical correlates of white matter findings on cranial magnetic resonance imaging of 3,301 elderly people: the cardiovascular health study. *Stroke* 1996; 27: 1274–82.
- Longstreth WT Jr, Sonnen JA, Koepsell TD, Kukull WA, Larson EB, Montine TJ. Associations between microinfarcts and other macroscopic vascular findings on neuropathologic examination in 2 databases. *Alzheimer Dis Assoc Disord* 2009; 23: 291–4.
- Minoshima S, Koeppe RA, Fessler JA, Mintun MA, Berger KL, Taylor SF, et al. Integrated and automated data analysis method for neuronal activation studying using O<sup>15</sup> water PET. Tokyo: Excerpta Medica; 1993. p. 409–18.
- Murray ME, Senjem ML, Petersen RC, Hollman JH, Preboske GM, Weigand SD, et al. Functional impact of white matter hyperintensities in cognitively normal elderly subjects. *Arch Neurol* 2010; 67: 1379–85.
- Pantoni L, Garcia JH. Pathogenesis of leucoaraiosis. *Stroke* 1997; 28: 652–9.
- Piccini P, Pavese N, Canapicchi R, Paoli C, Del Dotto P, Puglioli M, et al. White matter hyperintensities in Parkinson's disease. Clinical correlations. *Arch Neurol* 1995; 52: 191–4.
- Pirker W. Correlation of dopamine transporter imaging with parkinsonian motor handicap: How close is it? *Mov Disord* 2003; 18 (Suppl 7): S43–51.
- Schneider JA, Bennett DA. Where vascular meets neurodegenerative disease. *Stroke* 2010; 41: S144–6.
- Shulman LM, Gruber-Baldini AL, Anderson KE, Vaughan CG, Reich SG, Fishman PS, et al. The evolution of disability in Parkinson disease. *Mov Disord* 2008; 23: 790–6.
- Slawek J, Wieczorek D, Derejko M, Dubaniewicz M, Brockhuis B, Sitek E, et al. Vascular risk factors do not contribute to motor and cognitive impairment in Parkinson's disease. *Parkinsonism Relat Disord* 2010; 16: 73–4.
- Smith EE. Leucoaraiosis and stroke. *Stroke* 2010; 41: S139–43.
- Sohn YH, Kim JS. The influence of white matter hyperintensities on the clinical features of Parkinson's disease. *Yonsei Med J* 1998; 39: 50–5.
- Soumare A, Elbaz A, Zhu Y, Maillard P, Crivello F, Tavernier B, et al. White matter lesions volume and motor performances in the elderly. *Ann Neurol* 2009; 65: 706–15.
- Thompson CJ, Kecani S, Boelen S. Evaluation of a neck-shield for use during neurological studies with a whole-body PET scanner. *IEEE Trans Nucl Sci* 2001; 48: 1512–7.
- Tomlinson CL, Stowe R, Patel S, Rick C, Gray R, Clarke CE. Systematic review of levodopa dose equivalency reporting in Parkinson's disease. *Mov Disord* 2010; 25: 2649–53.
- van Swieten JC, van den Hout JH, van Ketel BA, Hijdra A, Wokke JH, van Gijn J. Periventricular lesions in the white matter on magnetic resonance imaging in the elderly. A morphometric correlation with arteriosclerosis and dilated perivascular spaces. *Brain* 1991; 114 (Pt 2): 761–74.
- Vingerhoets FJG, Schulzer M, Calne DB, Snow BJ. Which clinical sign of Parkinson's disease best reflects the nigrostriatal lesion? *Ann Neurol* 1997; 41: 58–64.
- Wersching H, Duning T, Lohmann H, Mohammadi S, Stehling C, Fobker M, et al. Serum C-reactive protein is linked to cerebral microstructural integrity and cognitive function. *Neurology* 2010; 74: 1022–9.
- Young VG, Halliday GM, Kril JJ. Neuropathologic correlates of white matter hyperintensities. *Neurology* 2008; 71: 804–11.
